# Supplementary material for: Gender-Specific Efficacy Revealed by Head-to-Head Comparison of Pasireotide and Octreotide in a Representative In Vivo Model of Nonfunctioning Pituitary Tumors
Source: MDPI journal article supplement (doi:10.3390/cancers13123097), 2021-06-21
Supplement: s1 [file s1]

Supplementary

# Gender-Specific Efficacy Revealed by Head-to-Head Comparison of Pasireotide and Octreotide in a Representative In Vivo Model of Nonfunctioning Pituitary Tumors

Sebastian Gulde et. al

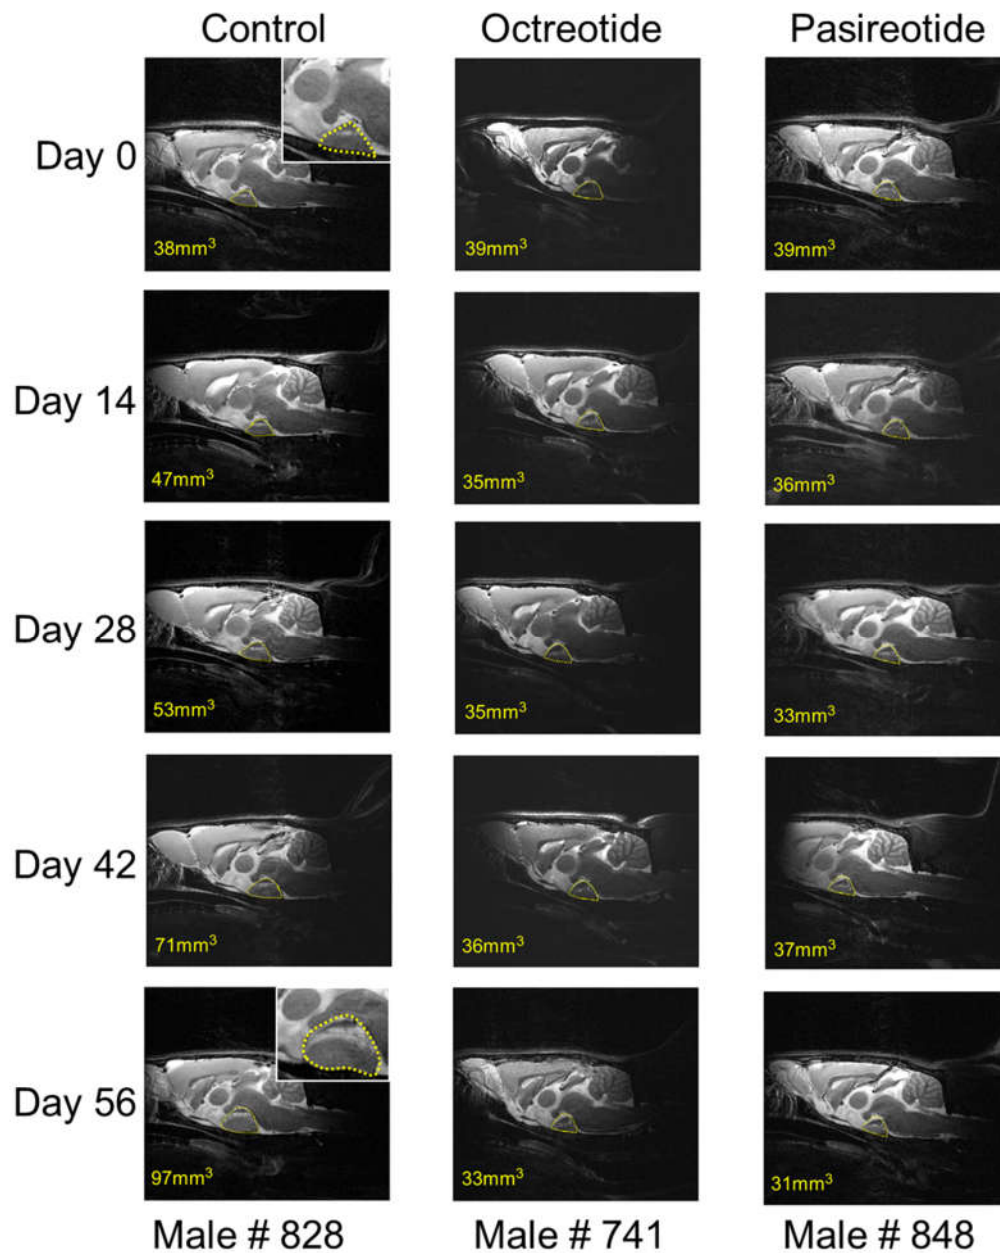

**Figure S1. MRI of the pituitary glands of male rats representative of the three treatment groups.** Screenshots of the longitudinal MRI scans of three male rats were taken always through the largest gland diameter. Tumor volume at the different time points is indicated. The dotted line illustrates the pituitary gland.

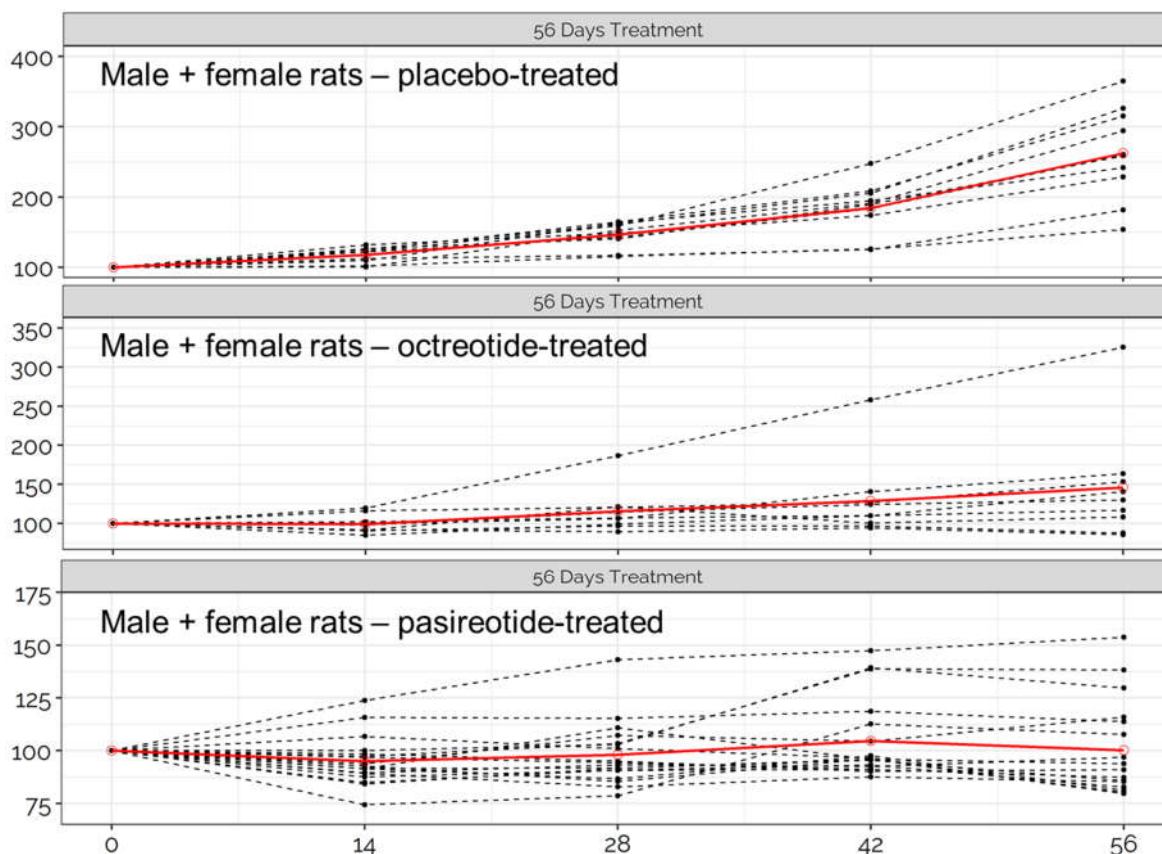

**Figure S2. Trace plots of relative tumor volume in the various group treated for 56d.** Trace plots of tumor volume for mutant male and female rats together, relative to volume at day 0 for each animal. Details about individual rats and the statistical analyses are reported in Figure 2.

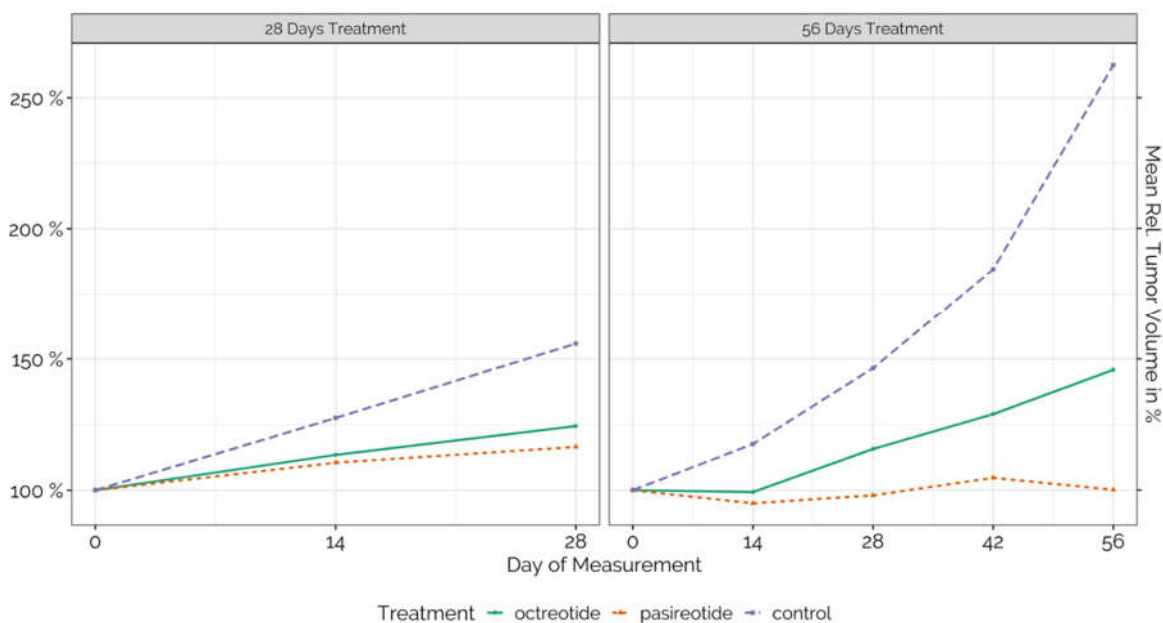

**Figure S3.** Mean relative tumor volume changes of the various treatment groups. Mean value slope of relative tumor volume for 7.5-month-old mutant rats belonging to the different treatment groups. Left side: 28d treated rats. right side: 56d treated rats

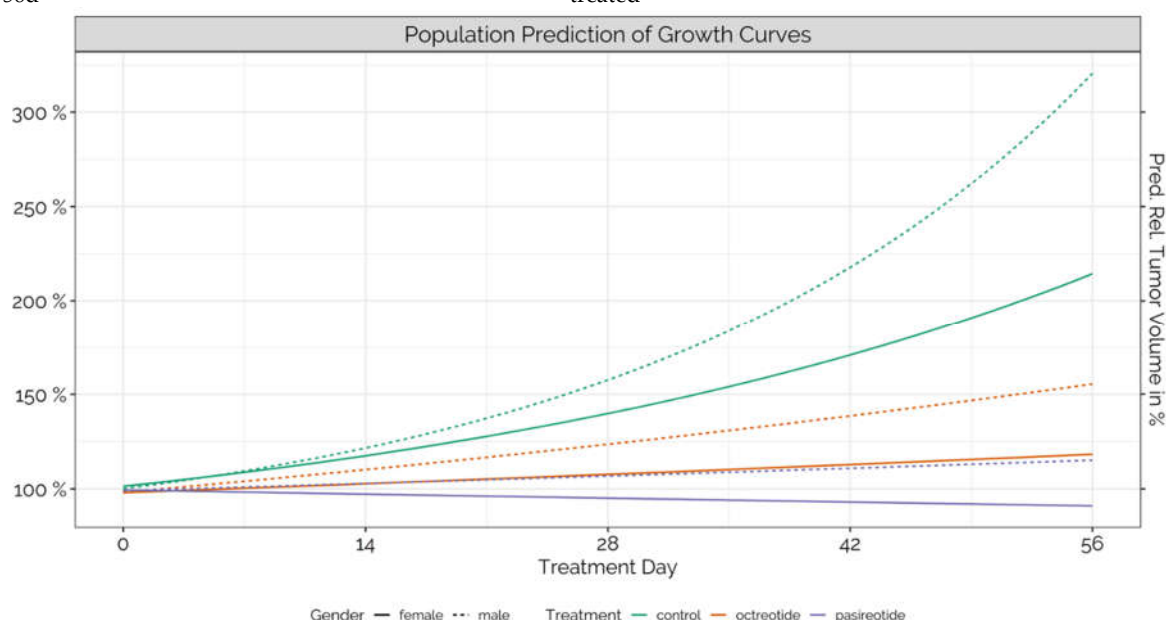

**Figure S4.** Population analysis of experimental tumor growth kinetics. For control rats, a LME model with mean structure of  $\log(\text{rel\_volume}) \sim 1 + \text{day} + \text{male} + \text{male} \times \text{day} + \text{day}^2 + \text{male} \times \text{day}^2$  and random effect structure  $\sim -1 + \text{day}$  achieved the best fit. In contrast, octreotide and pasireotide both had a mean structure of  $\log(\text{rel\_volume}) \sim 1 + \text{day} + \text{male} + \text{male} \times \text{day}$  with random effects structure of  $-1 + \text{day}$ ,  $-1 + \text{day} + \text{day}^2$ , respectively. All parameters are estimated by restricted maximum likelihood estimation. The fitted average rel. tumor volume profiles for different gender and treatment are shown.

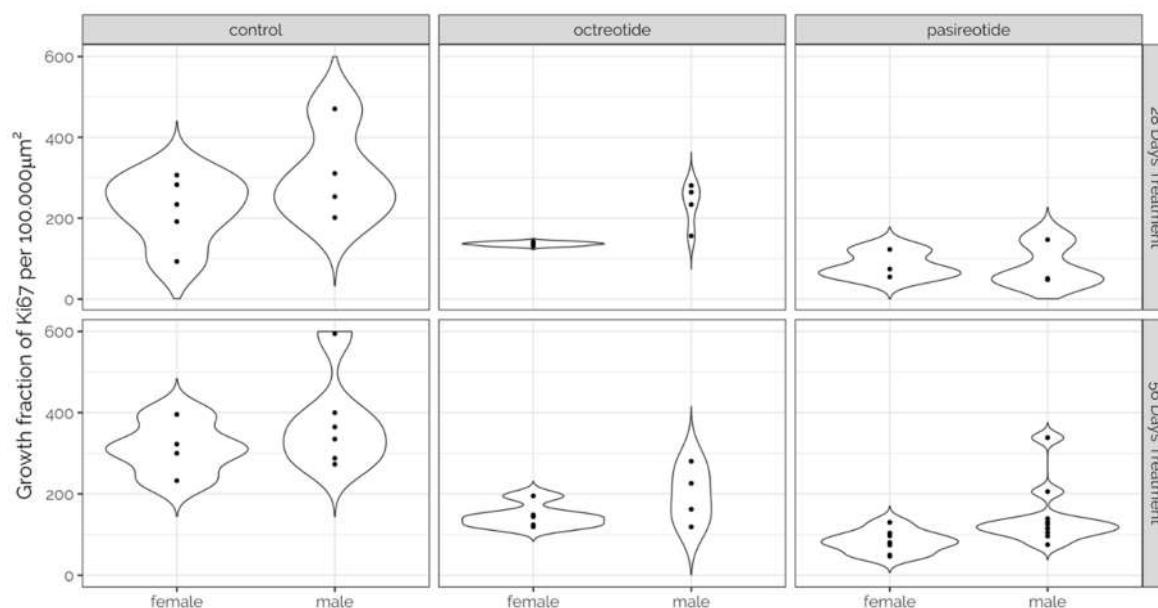

**Figure S5.** Tumor cell proliferation at the end of the treatment. The number of Ki67-positive cells/100.000  $\mu\text{m}^2$  was counted in a subset of rat PTs ( $n = 3$  to 8) of both genders and for each group at the end of treatment. Shown are the numbers for 28d treated rats (upper row), and for 56d treated animals (bottom row). The distribution is shown as a violin plot.

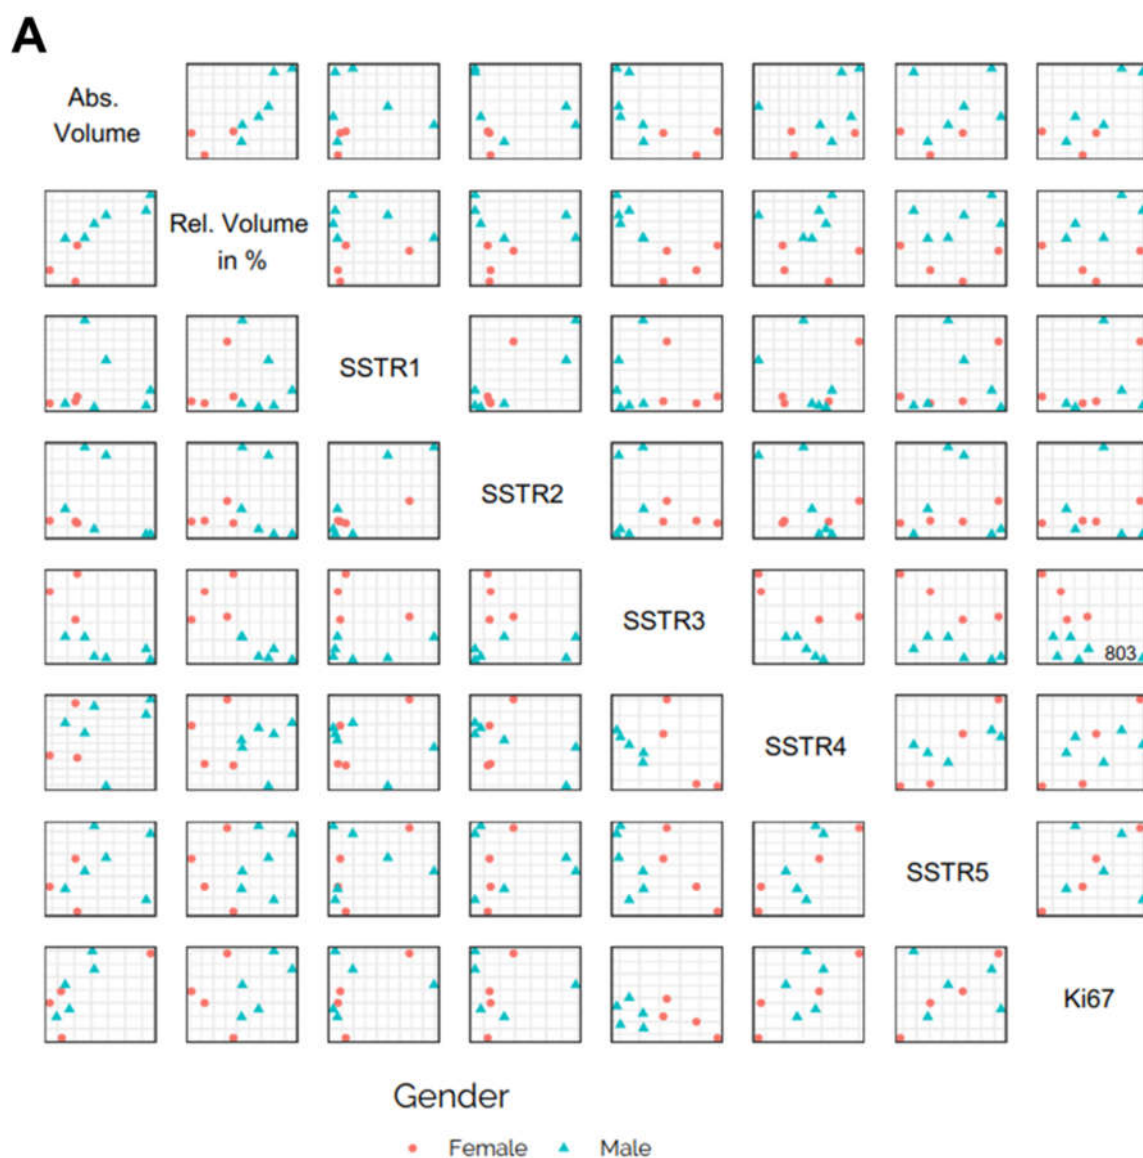

**B**

| Response    | Covariate   | Estimate                | Outlier | p-value | Significance |
|-------------|-------------|-------------------------|---------|---------|--------------|
| Abs. Volume | Rel. Volume | $5.597 \times 10^{-4}$  | 802     | 0.0044  | **           |
| Abs. Volume | SSTR3       | $-6.675 \times 10^{-6}$ | 802     | 0.055   | .            |
| Abs. Volume | Ki67        | $6.771 \times 10^{-4}$  | 802,803 | 0.033   | *            |
| Rel. Volume | SSTR3       | -0.011                  | —       | 0.019   | * ←          |
| Rel. Volume | Gender      | 101.98                  | —       | 0.0048  | * ←          |

**Figure S6.** Relationship among qRT-PCR data, Ki67 proliferation rate and tumor volume in the control group. (A) Scatter matrix of Sstr gene expression by qRT-PCR, Ki67 staining and absolute or relative tumor volume in rats of the control group. (B) Table summarizing the relationship of some parameters shown in A. Red arrows point to the significant correlations mentioned in the Results.

Supplementary Table 1: List of the rats used for the study

| <u>Rat Nr.:</u> | <u>Treatment (days)</u> | <u>Gender</u> | <u>Age</u> |
|-----------------|-------------------------|---------------|------------|
| 673             | Placebo control (28d)   | M             | 7.5        |
| 674             | Placebo control (28d)   | M             | 7.5        |
| 758             | Placebo control (28d)   | M             | 8.5        |
| 760             | Placebo control (28d)   | M             | 8.5        |
| 803             | Placebo control (2x28d) | M             | 8          |
| 823             | Placebo control (2x28d) | M             | 7.5        |
| 812             | Placebo control (2x28d) | M             | 8          |
| 813             | Placebo control (2x28d) | M             | 8          |
| 828             | Placebo control (2x28d) | M             | 7.5        |
| 829             | Placebo control (2x28d) | M             | 7.5        |
| 679             | Placebo control (28d)   | F             | 7.5        |
| 681             | Placebo control (28d)   | F             | 7.5        |
| 683             | Placebo control (28d)   | F             | 7.5        |
| 772             | Placebo control (28d)   | F             | 8.5        |
| 773             | Placebo control (28d)   | F             | 8.5        |
| 802             | Placebo control (2x28d) | F             | 8          |
| 818             | Placebo control (2x28d) | F             | 7.5        |
| 807             | Placebo control (2x28d) | F             | 8          |
| 808             | Placebo control (2x28d) | F             | 8          |
| 696             | Sandostatin (28d)       | M             | 7.5        |
| 707             | Sandostatin (28d)       | M             | 7.5        |
| 698             | Sandostatin (28d)       | M             | 7.5        |
| 708             | Sandostatin (28d)       | M             | 7.5        |
| 731             | Sandostatin (2x28d)     | M             | 7.5        |
| 740             | Sandostatin (2x28d)     | M             | 7.5        |
| 741             | Sandostatin (2x28d)     | M             | 7.5        |
| 887             | Sandostatin (2x28d)     | M             | 7.5        |
| 703             | Sandostatin (28d)       | F             | 7.5        |
| 704             | Sandostatin (28d)       | F             | 7.5        |
| 706             | Sandostatin (28d)       | F             | 7.5        |
| 720             | Sandostatin (28d)       | F             | 7.5        |
| 736             | Sandostatin (2x28d)     | F             | 7.5        |
| 737             | Sandostatin (2x28d)     | F             | 7.5        |
| 747             | Sandostatin (2x28d)     | F             | 7.5        |
| 891             | Sandostatin (2x28d)     | F             | 7.5        |
| 897             | Sandostatin (2x28d)     | F             | 7.5        |
| 665             | Signifor (28d)          | M             | 7.5        |
| 686             | Signifor (28d)          | M             | 7.5        |
| 675             | Signifor (28d)          | M             | 7.5        |
| 729             | Signifor (2x28d)        | M             | 7          |
| 730             | Signifor (2x28d)        | M             | 7.5        |
| 743             | Signifor (2x28d)        | M             | 7.5        |
| 837             | Signifor (2x28d)        | M             | 8          |
| 847             | Signifor (2x28d)        | M             | 7.5        |
| 848             | Signifor (2x28d)        | M             | 7.5        |
| 849             | Signifor (2x28d)        | M             | 7.5        |
| 850             | Signifor (2x28d)        | M             | 7.5        |
| 851             | Signifor (2x28d)        | M             | 7.5        |
| 852             | Signifor (2x28d)        | M             | 7.5        |
| 680             | Signifor (28d)          | F             | 7.5        |
| 684             | Signifor (28d)          | F             | 7.5        |
| 678             | Signifor (28d)          | F             | 7.5        |
| 732             | Signifor (2x28d)        | F             | 7.5        |
| 735             | Signifor (2x28d)        | F             | 7.5        |
| 739             | Signifor (2x28d)        | F             | 7.5        |
| 771             | Signifor (2x28d)        | F             | 7.5        |
| 831             | Signifor (2x28d)        | F             | 8          |
| 832             | Signifor (2x28d)        | F             | 8          |
| 835             | Signifor (2x28d)        | F             | 8          |
| 842             | Signifor (2x28d)        | F             | 7.5        |

Supplemental Table 2. Longitudinal data of rats treated with placebo (control)

| Rat | Gender | Day | Abs.<br>Volume | Rel.<br>Volume | SUV   |
|-----|--------|-----|----------------|----------------|-------|
| 673 | M      | 0   | 0.068          | 100.00         | 0.833 |
| 673 | M      | 14  | 0.087          | 129.25         | 0.708 |
| 673 | M      | 28  | 0.122          | 179.91         | 0.065 |
| 674 | M      | 0   | 0.038          | 100.00         | 0.943 |
| 674 | M      | 14  | 0.048          | 126.79         | 0.589 |
| 674 | M      | 28  | 0.064          | 169.50         | 0.067 |
| 679 | F      | 0   | 0.112          | 100.00         | 1.024 |
| 679 | F      | 14  | 0.122          | 108.64         | 1.304 |
| 679 | F      | 28  | 0.127          | 113.36         | 0.079 |
| 681 | F      | 0   | 0.08           | 100.00         | 0.634 |
| 681 | F      | 14  | 0.097          | 120.62         | 0.58  |
| 681 | F      | 28  | 0.107          | 132.42         | 0.051 |
| 683 | F      | 0   | 0.095          | 100.00         | 0.722 |
| 683 | F      | 14  | 0.102          | 107.44         | 1.304 |
| 683 | F      | 28  | 0.12           | 126.10         | 0.05  |
| 758 | M      | 0   | 0.106          | 100.00         | 2.12  |
| 758 | M      | 14  | 0.136          | 127.54         | NA    |
| 758 | M      | 28  | 0.218          | 204.51         | 2.434 |
| 760 | M      | 0   | 0.049          | 100.00         | 1.718 |
| 760 | M      | 14  | 0.056          | 114.90         | NA    |
| 760 | M      | 28  | 0.062          | 126.33         | 2.07  |
| 772 | F      | 0   | 0.067          | 100.00         | 0.837 |
| 772 | F      | 14  | 0.104          | 155.74         | NA    |
| 772 | F      | 28  | 0.108          | 161.25         | 0.793 |
| 773 | F      | 0   | 0.067          | 100.00         | 0.838 |
| 773 | F      | 14  | 0.105          | 156.53         | NA    |
| 773 | F      | 28  | 0.127          | 188.72         | 0.945 |
| 802 | F      | 0   | 0.164          | 100.00         | 2.971 |
| 802 | F      | 14  | 0.216          | 131.73         | NA    |
| 802 | F      | 28  | 0.244          | 148.54         | 1.587 |
| 802 | F      | 42  | 0.285          | 173.69         | NA    |
| 802 | F      | 56  | 0.375          | 228.62         | 4.051 |
| 803 | M      | 0   | 0.048          | 100.00         | 2.539 |
| 803 | M      | 14  | 0.059          | 124.48         | NA    |
| 803 | M      | 28  | 0.079          | 164.64         | 2.157 |
| 803 | M      | 42  | 0.1            | 208.58         | NA    |
| 803 | M      | 56  | 0.151          | 315.06         | 1.779 |
| 807 | F      | 0   | 0.042          | 100.00         | 1.076 |
| 807 | F      | 14  | 0.048          | 112.29         | NA    |
| 807 | F      | 28  | 0.049          | 116.79         | 0.873 |
| 807 | F      | 42  | 0.053          | 125.06         | NA    |
| 807 | F      | 56  | 0.077          | 181.32         | 1.076 |
| 808 | F      | 0   | 0.072          | 100.00         | 1.003 |
| 808 | F      | 14  | 0.073          | 101.53         | NA    |
| 808 | F      | 28  | 0.083          | 115.18         | 0.874 |
| 808 | F      | 42  | 0.09           | 125.63         | NA    |
| 808 | F      | 56  | 0.11           | 153.76         | 1.24  |
| 812 | M      | 0   | 0.046          | 100.00         | 1.265 |
| 812 | M      | 14  | 0.046          | 100.44         | NA    |
| 812 | M      | 28  | 0.07           | 152.72         | 0.932 |
| 812 | M      | 42  | 0.088          | 191.29         | NA    |
| 812 | M      | 56  | 0.135          | 294.34         | 1.718 |
| 813 | M      | 0   | 0.047          | 100.00         | 1.167 |
| 813 | M      | 14  | 0.057          | 121.66         | NA    |
| 813 | M      | 28  | 0.067          | 142.89         | 1.07  |
| 813 | M      | 42  | 0.086          | 183.44         | NA    |
| 813 | M      | 56  | 0.123          | 260.30         | 1.833 |
| 818 | F      | 0   | 0.047          | 100.00         | 1.452 |
| 818 | F      | 14  | 0.051          | 109.42         | NA    |
| 818 | F      | 28  | 0.076          | 163.17         | 1.054 |
| 818 | F      | 42  | 0.091          | 194.86         | NA    |
| 818 | F      | 56  | 0.113          | 241.54         | 1.291 |
| 823 | M      | 0   | 0.062          | 100.00         | 1.523 |
| 823 | M      | 14  | 0.078          | 125.72         | NA    |
| 823 | M      | 28  | 0.1            | 161.09         | 1.108 |
| 823 | M      | 42  | 0.128          | 205.15         | NA    |
| 823 | M      | 56  | 0.203          | 326.37         | 1.375 |
| 828 | M      | 0   | 0.037          | 100.00         | 0.883 |
| 828 | M      | 14  | 0.047          | 126.13         | NA    |
| 828 | M      | 28  | 0.053          | 140.53         | 0.668 |
| 828 | M      | 42  | 0.071          | 189.07         | NA    |
| 828 | M      | 56  | 0.097          | 258.67         | 0.711 |
| 829 | M      | 0   | 0.057          | 100.00         | 2.925 |
| 829 | M      | 14  | 0.07           | 122.20         | NA    |
| 829 | M      | 28  | 0.091          | 159.27         | 1.867 |
| 829 | M      | 42  | 0.142          | 247.73         | NA    |
| 829 | M      | 56  | 0.209          | 365.04         | 3.467 |

Supplemental Table 3. Longitudinal data of rats treated with octreotide LAR

| Rat | Gender | Day | Abs.<br>Volume | Rel.<br>Volume | SUV   |
|-----|--------|-----|----------------|----------------|-------|
| 696 | M      | 0   | 0.128          | 100.00         | 1.079 |
| 696 | M      | 14  | 0.166          | 129.11         | NA    |
| 696 | M      | 28  | 0.236          | 183.66         | 0.815 |
| 698 | M      | 0   | 0.086          | 100.00         | 1.922 |
| 698 | M      | 14  | 0.123          | 143.51         | NA    |
| 698 | M      | 28  | 0.138          | 161.87         | 1.096 |
| 703 | F      | 0   | 0.044          | 100.00         | 0.652 |
| 703 | F      | 14  | 0.044          | 99.10          | NA    |
| 703 | F      | 28  | 0.05           | 112.14         | 0.477 |
| 704 | F      | 0   | 0.066          | 100.00         | 1.33  |
| 704 | F      | 14  | 0.077          | 117.02         | NA    |
| 704 | F      | 28  | 0.085          | 128.72         | 0.678 |
| 706 | F      | 0   | 0.06           | 100.00         | 0.788 |
| 706 | F      | 14  | 0.063          | 104.49         | NA    |
| 706 | F      | 28  | 0.062          | 102.49         | 0.564 |
| 707 | M      | 0   | 0.043          | 100.00         | 1.005 |
| 707 | M      | 14  | 0.041          | 96.26          | NA    |
| 707 | M      | 28  | 0.039          | 92.06          | 0.505 |
| 708 | M      | 0   | 0.037          | 100.00         | 0.714 |
| 708 | M      | 14  | 0.045          | 121.83         | NA    |
| 708 | M      | 28  | 0.045          | 120.49         | 0.52  |
| 720 | F      | 0   | 0.073          | 100.00         | 0.858 |
| 720 | F      | 14  | 0.07           | 95.91          | NA    |
| 720 | F      | 28  | 0.069          | 93.86          | 0.624 |
| 731 | M      | 0   | 0.093          | 100.00         | 1.067 |
| 731 | M      | 14  | 0.112          | 119.70         | NA    |
| 731 | M      | 28  | 0.174          | 186.51         | 0.684 |
| 731 | M      | 42  | 0.241          | 257.92         | NA    |
| 731 | M      | 56  | 0.304          | 325.59         | 0.863 |
| 736 | F      | 0   | 0.102          | 100.00         | 0.759 |
| 736 | F      | 14  | 0.092          | 90.57          | NA    |
| 736 | F      | 28  | 0.098          | 96.56          | 0.622 |
| 736 | F      | 42  | 0.099          | 96.86          | NA    |
| 736 | F      | 56  | 0.089          | 87.72          | 0.564 |
| 737 | F      | 0   | 0.101          | 100.00         | 0.707 |
| 737 | F      | 14  | 0.092          | 91.39          | NA    |
| 737 | F      | 28  | 0.122          | 121.19         | 0.64  |
| 737 | F      | 42  | 0.102          | 100.59         | NA    |
| 737 | F      | 56  | 0.109          | 108.22         | 0.472 |
| 740 | M      | 0   | 0.043          | 100.00         | 0.725 |
| 740 | M      | 14  | 0.044          | 102.10         | NA    |
| 740 | M      | 28  | 0.046          | 106.99         | 0.601 |
| 740 | M      | 42  | 0.047          | 109.79         | NA    |
| 740 | M      | 56  | 0.06           | 140.79         | 0.566 |
| 741 | M      | 0   | 0.039          | 100.00         | 1.409 |
| 741 | M      | 14  | 0.035          | 91.71          | NA    |
| 741 | M      | 28  | 0.034          | 89.38          | 0.679 |
| 741 | M      | 42  | 0.036          | 94.04          | NA    |
| 741 | M      | 56  | 0.033          | 85.75          | 0.611 |
| 747 | F      | 0   | 0.052          | 100.00         | 0.597 |
| 747 | F      | 14  | 0.044          | 84.59          | NA    |
| 747 | F      | 28  | 0.051          | 99.23          | 0.395 |
| 747 | F      | 42  | 0.057          | 109.63         | NA    |
| 747 | F      | 56  | 0.061          | 116.96         | 0.513 |
| 887 | M      | 0   | 0.044          | 100.00         | 1.625 |
| 887 | M      | 14  | 0.043          | 99.31          | NA    |
| 887 | M      | 28  | 0.046          | 106.18         | 0.628 |
| 887 | M      | 42  | 0.061          | 140.50         | NA    |
| 887 | M      | 56  | 0.071          | 163.62         | 1.05  |
| 891 | F      | 0   | 0.052          | 100.00         | 0.968 |
| 891 | F      | 14  | 0.061          | 116.19         | NA    |
| 891 | F      | 28  | 0.063          | 120.57         | 0.497 |
| 891 | F      | 42  | 0.066          | 126.67         | NA    |
| 891 | F      | 56  | 0.081          | 153.52         | 0.974 |
| 897 | F      | 0   | 0.135          | 100.00         | 1.225 |
| 897 | F      | 14  | 0.132          | 98.07          | NA    |
| 897 | F      | 28  | 0.154          | 114.34         | 0.783 |
| 897 | F      | 42  | 0.167          | 124.15         | NA    |
| 897 | F      | 56  | 0.175          | 130.09         | 1.152 |

Supplemental Table 4. Longitudinal data of rats treated with pasireotide LAR

| Rat | Gender | Day | Abs. Volume | Rel. Volume | SUV   |
|-----|--------|-----|-------------|-------------|-------|
| 665 | M      | 0   | 0.107       | 100         | 2.128 |
| 665 | M      | 14  | 0.133       | 124.461     | 1.144 |
| 665 | M      | 28  | 0.174       | 163.261     | 0.121 |
| 675 | M      | 0   | 0.062       | 100         | 0.727 |
| 675 | M      | 14  | 0.08        | 130.519     | 0.438 |
| 675 | M      | 28  | 0.087       | 142.045     | 0.053 |
| 678 | F      | 0   | 0.085       | 100         | 0.638 |
| 678 | F      | 14  | 0.082       | 95.882      | 0.647 |
| 678 | F      | 28  | 0.093       | 109.882     | 0.051 |
| 680 | F      | 0   | 0.097       | 100         | 0.604 |
| 680 | F      | 14  | 0.094       | 97.104      | 0.417 |
| 680 | F      | 28  | 0.083       | 86.143      | 0.048 |
| 684 | F      | 0   | 0.071       | 100         | 0.565 |
| 684 | F      | 14  | 0.075       | 105.791     | 0.366 |
| 684 | F      | 28  | 0.065       | 91.243      | 0.056 |
| 686 | M      | 0   | 0.038       | 100         | 1.354 |
| 686 | M      | 14  | 0.042       | 109.115     | 0.705 |
| 686 | M      | 28  | 0.041       | 106.25      | 0.074 |
| 729 | M      | 0   | 0.048       | 100         | 1.551 |
| 729 | M      | 14  | 0.042       | 87.526      | NA    |
| 729 | M      | 28  | 0.044       | 90.644      | 0.735 |
| 729 | M      | 42  | 0.044       | 91.06       | NA    |
| 730 | M      | 0   | 0.045       | 100         | 0.124 |
| 730 | M      | 14  | 0.045       | 100         | NA    |
| 730 | M      | 28  | 0.046       | 102.882     | 0.955 |
| 730 | M      | 42  | 0.063       | 139.246     | NA    |
| 730 | M      | 56  | 0.058       | 129.712     | 1.068 |
| 732 | F      | 0   | 0.045       | 100         | 0.783 |
| 732 | F      | 14  | 0.041       | 91.391      | NA    |
| 732 | F      | 28  | 0.05        | 110.817     | 0.857 |
| 732 | F      | 42  | 0.043       | 96.026      | NA    |
| 732 | F      | 56  | 0.042       | 93.819      | 0.55  |
| 735 | F      | 0   | 0.046       | 100         | 0.609 |
| 735 | F      | 14  | 0.039       | 84.934      | NA    |
| 735 | F      | 28  | 0.042       | 90.83       | 0.628 |
| 735 | F      | 42  | 0.043       | 93.231      | NA    |
| 735 | F      | 56  | 0.038       | 82.751      | 0.54  |
| 739 | F      | 0   | 0.087       | 100         | 1.104 |
| 739 | F      | 14  | 0.086       | 98.393      | NA    |
| 739 | F      | 28  | 0.083       | 95.063      | 0.72  |
| 739 | F      | 42  | 0.078       | 90.126      | NA    |
| 739 | F      | 56  | 0.079       | 90.93       | 0.439 |
| 743 | M      | 0   | 0.047       | 100         | 0.871 |
| 743 | M      | 14  | 0.035       | 74.364      | NA    |
| 743 | M      | 28  | 0.037       | 78.602      | 0.715 |
| 743 | M      | 42  | 0.053       | 112.712     | NA    |
| 743 | M      | 56  | 0.051       | 107.627     | 0.718 |
| 771 | F      | 0   | 0.032       | 100         | 0.601 |
| 771 | F      | 14  | 0.034       | 106.832     | NA    |
| 771 | F      | 28  | 0.032       | 100.932     | 0.357 |
| 771 | F      | 42  | 0.031       | 96.584      | NA    |
| 771 | F      | 56  | 0.026       | 79.814      | 0.596 |
| 831 | F      | 0   | 0.057       | 100         | 1.04  |
| 831 | F      | 14  | 0.048       | 84.211      | NA    |
| 831 | F      | 28  | 0.052       | 91.754      | 0.449 |
| 831 | F      | 42  | 0.055       | 95.965      | NA    |
| 831 | F      | 56  | 0.045       | 79.649      | 0.917 |
| 832 | F      | 0   | 0.039       | 100         | 0.899 |
| 832 | F      | 14  | 0.045       | 115.803     | NA    |
| 832 | F      | 28  | 0.044       | 115.285     | 0.366 |
| 832 | F      | 42  | 0.046       | 118.653     | NA    |
| 832 | F      | 56  | 0.044       | 113.731     | 0.883 |
| 835 | F      | 0   | 0.087       | 100         | 1.05  |
| 835 | F      | 14  | 0.081       | 93.887      | NA    |
| 835 | F      | 28  | 0.093       | 107.266     | 0.969 |
| 835 | F      | 42  | 0.091       | 104.498     | NA    |
| 835 | F      | 56  | 0.101       | 115.917     | 0.958 |
| 837 | M      | 0   | 0.041       | 100         | 0.809 |
| 837 | M      | 14  | 0.04        | 97.304      | NA    |
| 837 | M      | 28  | 0.042       | 103.431     | 0.645 |
| 837 | M      | 42  | 0.057       | 138.725     | NA    |
| 837 | M      | 56  | 0.056       | 138.235     | 1.352 |
| 842 | F      | 0   | 0.058       | 100         | 0.932 |
| 842 | F      | 14  | 0.053       | 91.522      | NA    |
| 842 | F      | 28  | 0.053       | 91.696      | 0.798 |
| 842 | F      | 42  | 0.055       | 95.502      | NA    |
| 842 | F      | 56  | 0.05        | 85.813      | 0.868 |
| 847 | M      | 0   | 0.038       | 100         | 0.785 |
| 847 | M      | 14  | 0.035       | 91.361      | NA    |
| 847 | M      | 28  | 0.033       | 86.649      | 0.537 |
| 847 | M      | 42  | 0.037       | 97.644      | NA    |
| 847 | M      | 56  | 0.031       | 81.152      | 0.971 |
| 848 | M      | 0   | 0.038       | 100         | 0.954 |
| 848 | M      | 14  | 0.036       | 92.727      | NA    |
| 848 | M      | 28  | 0.033       | 85.455      | 0.411 |
| 848 | M      | 42  | 0.037       | 96.104      | NA    |
| 848 | M      | 56  | 0.031       | 80.26       | 0.796 |
| 849 | M      | 0   | 0.038       | 100         | 0.56  |
| 849 | M      | 14  | 0.034       | 89.529      | NA    |
| 849 | M      | 28  | 0.036       | 93.194      | 0.448 |
| 849 | M      | 42  | 0.035       | 92.408      | NA    |
| 849 | M      | 56  | 0.037       | 96.859      | 0.863 |
| 850 | M      | 0   | 0.044       | 100         | 0.884 |
| 850 | M      | 14  | 0.039       | 89.245      | NA    |
| 850 | M      | 28  | 0.036       | 82.838      | 0.527 |
| 850 | M      | 42  | 0.038       | 87.643      | NA    |
| 850 | M      | 56  | 0.037       | 85.355      | 0.837 |
| 851 | M      | 0   | 0.042       | 100         | 1.335 |
| 851 | M      | 14  | 0.04        | 96.867      | NA    |
| 851 | M      | 28  | 0.039       | 94.217      | 0.432 |
| 851 | M      | 42  | 0.038       | 91.084      | NA    |
| 851 | M      | 56  | 0.036       | 87.229      | 0.734 |
| 852 | M      | 0   | 0.053       | 100         | 0.773 |
| 852 | M      | 14  | 0.066       | 123.783     | NA    |
| 852 | M      | 28  | 0.076       | 143.071     | 0.475 |
| 852 | M      | 42  | 0.079       | 147.378     | NA    |
| 852 | M      | 56  | 0.082       | 153.745     | 1.172 |
